# Supplementary material for: The dielectric constant in a thermal phase transition magnetic material composed of rubidium manganese hexacyanoferrate observed by spectroscopic ellipsometry
Source: Royal Society of Chemistry journal article supplement (doi:10.1039/b504062k), 2005-01-01
Supplement: b504062k.pdf [file b504062k.pdf]

### Electronic Supplementary Information

#### The dielectric constant in a thermal phase transition magnetic material compound of rubidium manganese hexacyanoferrate observed by spectroscopic ellipsometry

Shin-ichi Ohkoshi,<sup>\*ab</sup> Tomohiro Nuida,<sup>a</sup> Tomoyuki Matsuda,<sup>a</sup> Hiroko Tokoro,<sup>a</sup>  
and Kazuhito Hashimoto<sup>\*a</sup>

<sup>a</sup> Department of Applied Chemistry, School of Engineering, The University of Tokyo  
7-3-1 Hongo, Bunkyo-ku, Tokyo 113-8656, Japan

<sup>b</sup> PRESTO, JST, 4-1-8 Honcho Kawaguchi, Saitama, 332-0012, Japan

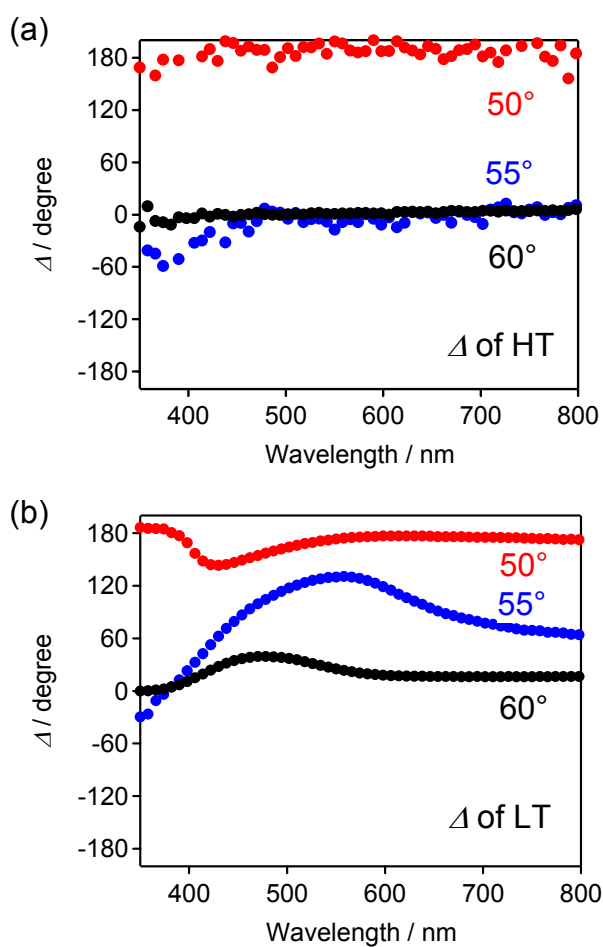

**Fig. S1.** The wavelength dependences of  $\Delta$  in the HT phase (a) and LT phase (b) measured at various incident angles ( $\theta$ ) near the pseudo-Brewster's angle ( $\theta_B \approx 53^\circ$ ): (red)  $\theta = 50^\circ$ ; (blue)  $\theta = 55^\circ$ ; (black)  $\theta = 60^\circ$ .

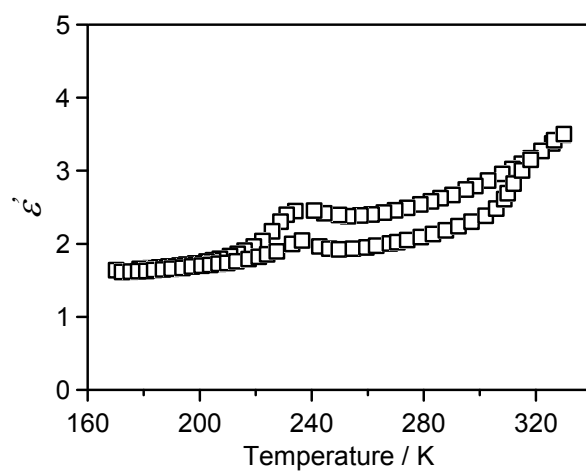

**Fig. S2.** Temperature dependence of  $\epsilon'$  collected by a LCR meter at 100 kHz.
